# Supplementary material for: Delta‐like ligand‐4 regulates Notch‐mediated maturation of second heart field progenitor‐derived pharyngeal arterial endothelial cells
Source: PubMed Central journal article supplement (PMC9575135; doi:10.1111/jcmm.17542), 2022-09-09
Supplement: JCMM-26-5181-s001.pdf [file JCMM-26-5181-s001.pdf]

**Table S2**

| <b>Antibody, Vector Information, Cell Lines and Chemicals</b> |                          |                                        |
|---------------------------------------------------------------|--------------------------|----------------------------------------|
| <b>Antibody</b>                                               | <b>Catalog number</b>    | <b>Working Concentration /Dilution</b> |
| <b>Dll4</b> (Rabbit polyclonal)                               | Ab7280 (Abcam)           | 20µg/mL                                |
| <b>Dll4</b> (Rabbit polyclonal)                               | PA1-86891 (Thermofisher) | 5µg/mL                                 |
| <b>Islet1</b> (Goat Polyclonal)                               | AF1837 (R&D)             | 10µg/mL                                |
| <b>pHH3</b> (Rabbit polyclonal)                               | 9701S (Cell Signaling)   | 0.1µg/mL                               |
| <b>CD31</b> (Goat Polyclonal)                                 | AF3628 (R&D)             | 1µg/mL                                 |
| <b>CD31</b> (Rat Monoclonal)                                  | 550274 (BD Pharmingen)   | 1:100                                  |
| <b>EphrinB2</b> (Goat Polyclonal)                             | AF496 (R&D)              | 1µg/mL                                 |
| <b>EphB4</b> (Goat Polyclonal)                                | AF446 (R&D)              | 1µg/mL                                 |
| <b>Neuropilin1</b> (Goat Polyclonal)                          | AF566 (R&D)              | 10µg/mL                                |
| <b>Neuropilin2</b> (Goat Polyclonal)                          | AF567 (R&D)              | 10µg/mL                                |
| <b>Hey1</b> (Rabbit Polyclonal)                               | NBP2-16818 (Novus)       | 1:100                                  |
| <b>SMα</b> (Rabbit Polyclonal)                                | NBP1-30894 (Novus)       | 1:100                                  |
| <b>Notch1</b> (Rabbit Monoclonal)                             | EP1238Y (Abcam)          | 1:100                                  |
| <b>Notch4</b> (Rabbit Monoclonal)                             | EPR18049 (Abcam)         | 1:200                                  |
| <b>Jagged1</b> (Rabbit Polyclonal)                            | PA5-86057 (Invitrogen)   | 1:50                                   |
| <b>Anti-Digoxigenin-POD, Fab fragments</b>                    | 11207733910 (Roche)      | 0.5U/mL                                |
| <b>VEGF 165 Protein</b>                                       | 293-VE-050/CF (R&D)      | 2.5ng/mL                               |
| <b>Cell lines</b>                                             |                          |                                        |
| <b>293T/17 [HEK 293T/17]</b>                                  | CRL-11268 (ATCC)         |                                        |
| <b>Human Umbilical Artery Endothelial Cells</b>               | C12202 (PromoCell)       |                                        |
