# Supplementary material for: Delta‐like ligand‐4 regulates Notch‐mediated maturation of second heart field progenitor‐derived pharyngeal arterial endothelial cells
Source: PubMed Central journal article supplement (PMC9575135; doi:10.1111/jcmm.17542), 2022-09-09
Supplement: JCMM-26-5181-s004.pdf [file JCMM-26-5181-s004.pdf]

# Table S1

| <b>Primer</b>             | <b>Sequence</b>        |
|---------------------------|------------------------|
| <b>Dll4FF</b>             |                        |
| Dll4-F                    | GTGCTGGGACTGTAGCCACT   |
| Dll4-R                    | TGTTAGGGATGTGCTCTCC    |
| <b>Dll4-F2-LacZ</b>       |                        |
| LacZ-F                    | ATCCTCTGCATGGTCAGGTC   |
| LacZ-R                    | CGTGGCCTGATTCATTCC     |
| <b>Mef2c-Cre</b>          |                        |
| Mef2cCre-F                | GAGCGTACGTGCTGCTTAGA   |
| Mef2cCre-R                | AATCGCGAACATCTTCAGGT   |
| <b>Islet1-Cre</b>         |                        |
| Islet1Cre Common-F        | GCCACTATTTGCCACCTAGC   |
| Islet1Cre Mutant allele-R | AGGCAAATTTTGGTGTACGG   |
| Isl1Cre Wildtype allele-R | CAAATCCAAAGAGCCCTGTC   |
| <b>Notch Reporter</b>     |                        |
| Notch Forward             | ACGTAAACGGCCACAAGTTC   |
| Notch Reverse             | AAGTCGTGCTGCTTCATGTG   |
| <b>R26RtdTomato</b>       |                        |
| Common Forward            | AAGGGAGCTGCAGTGGAGTA   |
| Wildtype Reverse          | CCGAAAATCTGTGGGAAGTC   |
| Mutant Reverse            | CGGGCCATTTACCGTAAGTTAT |
| <b>Wnt1-Cre</b>           |                        |
| Wnt1-Cre-F                | CCTCTATCGAACAAGCATGCG  |
| Wnt1-Cre-R                | GCCAATCTATCTGTGACGGC   |
